# Supplementary material for: Synonymous mutations make dramatic contributions to fitness when growth is limited by a weak-link enzyme
Source: PubMed Central journal article supplement (PMC6128649; doi:10.1371/journal.pgen.1007615), 2018-08-27
Supplement: pgen.1007615.s004.pdf [file pgen.1007615.s004.pdf]

codon 6 – GGC to GGG

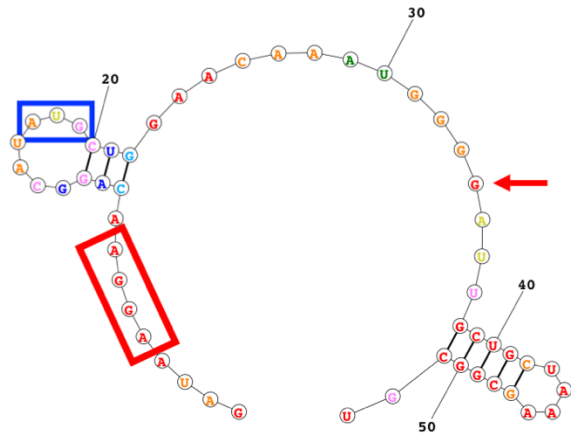

energy = -9.4

codon 6 – GGC to GGA

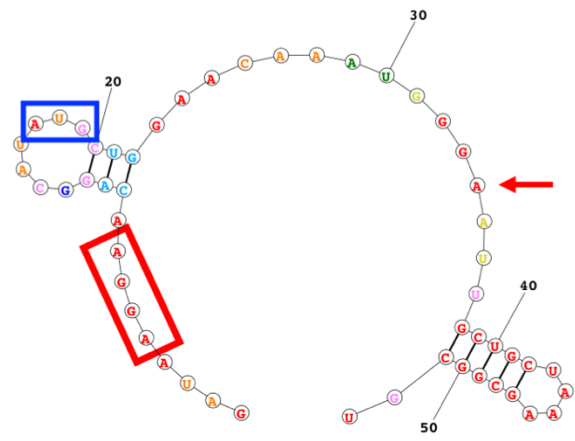

energy = -9.4

- probability  $\geq 99\%$
- 99% > probability  $\geq 95\%$
- 95% > probability  $\geq 90\%$
- 90% > probability  $\geq 80\%$
- 80% > probability  $\geq 70\%$
- 70% > probability  $\geq 60\%$
- 60% > probability  $\geq 50\%$
- 50% > probability
