# Supplementary material for: Synonymous mutations make dramatic contributions to fitness when growth is limited by a weak-link enzyme
Source: PubMed Central journal article supplement (PMC6128649; doi:10.1371/journal.pgen.1007615), 2018-08-27

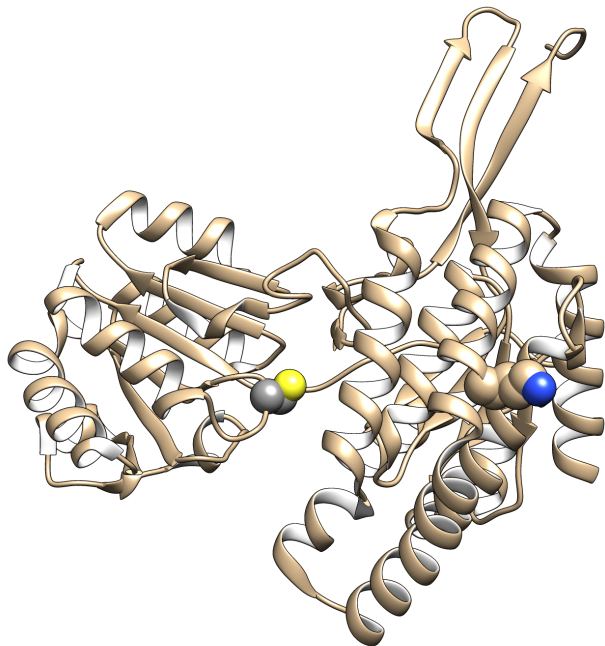

Supplement: pgen.1007615.s005.pdf [file pgen.1007615.s005.pdf]
